# Supplementary material for: Internalized compartments encapsulated nanogels for targeted drug delivery
Source: Royal Society of Chemistry journal article supplement (doi:10.1039/c5nr08895j), 2016-01-01
Supplement: c5nr08895j1.pdf [file c5nr08895j1.pdf]

## Electronic supplementary information (ESI)

### Internalized Compartments Encapsulated Nanogels for Targeted Drug Delivery

Jicheng Yu<sup>a,b</sup>, Yuqi Zhang<sup>a,b</sup>, Wujin Sun<sup>a,b</sup>, Chao Wang<sup>a,b</sup>, Davis Ranson<sup>a</sup>, Yanqi Ye<sup>a,b</sup>,  
Yuyan Weng<sup>c,\*</sup>, Zhen Gu<sup>a,b,d,\*</sup>

a. Joint Department of Biomedical Engineering, University of North Carolina at Chapel Hill and North Carolina State University, Raleigh, NC 27695, USA. E-mail: zgu@email.unc.edu.

b. Molecular Pharmaceutics Division, Eshelman School of Pharmacy, University of North Carolina at Chapel Hill, Chapel Hill, NC 27599, USA.

c. Center for Soft Condensed Matter Physics and Interdisciplinary Research & College of Physics, Optoelectronics and Energy, Soochow University, Suzhou, 215006, China. E-mail: wengyy@suda.edu.cn.

d. Department of Medicine, University of North Carolina School of Medicine, Chapel Hill, NC 27599, USA.

## Experimental section

### Synthesis of methacrylate HA (*m*-HA)

*m*-HA was synthesized following the previous reported reference<sup>1</sup>. Briefly, 1.0 g of HA was dissolved in 50 mL of DI water at 4 °C, and then 0.8 mL of methacrylic anhydride (MA) was dropwise added. The reaction solution was kept at pH 8 - 9 by the addition of 5N NaOH and stirred at 4 °C for 24 h. After precipitation in acetone, the resulting polymer was washed 3 times with ethanol, re-dissolved in DI water, and then dialyzed against DI water for 48 h. *m*-HA was achieved by lyophilization with a yield of 87.5 %. The degree of modification was calculated to be 15 % by comparing the ratio of the areas under the proton peaks at 5.74 and 6.17 ppm (methacrylate protons) to the peak at 1.99 ppm (*N*-acetyl glucosamine of HA) after performing a standard deconvolution algorithm to separate closely spaced peaks. *m*-HA: <sup>1</sup>H NMR (D<sub>2</sub>O, 300 MHz, δ ppm): 1.85-1.96 (m, 3H, CH<sub>2</sub>=C(CH<sub>3</sub>)CO), 1.99 (s, 3H, NHCOCH<sub>3</sub>), 5.74 (s, 1H, CH<sup>1</sup>H<sup>2</sup>=C(CH<sub>3</sub>)CO), 6.17 (s, 1H, CH<sup>1</sup>H<sup>2</sup>=C(CH<sub>3</sub>)CO).

### Synthesis of rhodamine-HA derivative

*m*-HA (120 mg) was mixed with 1-ethyl-3-(3-dimethylaminopropyl)carbodiimide (EDC)/*N*-hydroxysuccinimide (NHS) (50 mg/30 mg) for the activation of carbonyl groups on HA in pH 5.0 acetic buffer for 30 min, followed by additional 1,6-diaminohexane (60 mg) for another 4 h. The mixture was precipitated in 2-propanol (IPA) to remove unreacted diamine. The HA-amine derivative was reacted with rhodamine-NHS (0.4 mg) in sodium bicarbonate solution (50 mM; pH=8.5) for 4 h and precipitated in acetone to remove the unreacted rhodamine. The resulting rhodamine-HA derivative was dissolved in DI water.

## Reference

1. J. Yu, Y. Zhang, Y. Ye, R. DiSanto, W. Sun, D. Ranson, F. S. Ligler, J. B. Buse and Z. Gu, *Proc Natl Acad Sci*, 2015, **112**, 8260-8265.

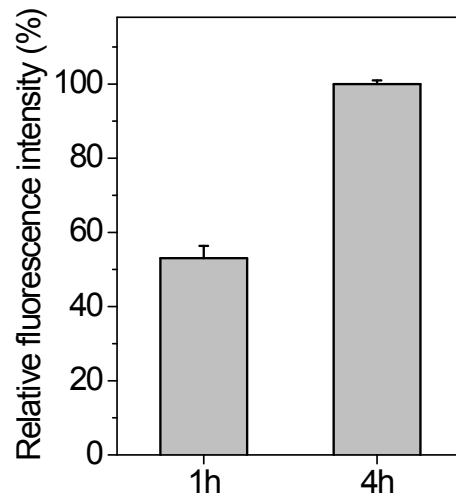

**Fig. S1** Relative fluorescence intensity of DOX-EM-NGs on HeLa cells after incubation of 1 h and 4 h determined by flow cytometry.
